# Supplementary material for: Mitochondrial Fission Process 1 controls inner membrane integrity and protects against heart failure
Source: PubMed Central journal article supplement (PMC9636241; doi:10.1038/s41467-022-34316-3), 2022-11-04
Supplement: 41467_2022_34316_MOESM3_ESM.pdf [file 41467_2022_34316_MOESM3_ESM.pdf]

## **Description of additional supplementary files**

**Supplementary Data 1:** Cardiac Proteome - WT vs cMKO

**Supplementary Data 2:** RNAseq - WT vs cMKO

**Supplementary Data 3:** Cardiac CoIP WT vs FLAG-MTFP1

**Supplementary Data 4:** Reagents
